# Supplementary material for: Reliable manipulation of gas bubbles by regulating interfacial morphologies and chemical components
Source: Royal Society of Chemistry journal article supplement (doi:10.1039/c7mh00145b), 2017-01-01
Supplement: c7mh00145b1.pdf [file c7mh00145b1.pdf]

**Bio-inspired Reliable Manipulation of Gas Bubbles on Interfaces by Regulating Their Microstructures and Chemical Components**

Peipei Zhang,<sup>a</sup> Jingjing Zhang,<sup>a</sup> Zhongxin Xue,<sup>b</sup> Jingming Wang<sup>\*a</sup> and Lei Jiang<sup>ac</sup>

a. Key Laboratory of Bio-Inspired Smart Interfacial Science and Technology of Ministry of Education, School of Chemistry and Environment, Beihang University, Beijing, 100191, P.R. China.

b. School of Chemistry and Materials Science, Ludong University, Yantai, 264025, P.R. China.

c. Laboratory of Bio-inspired Smart Interface Science, Technical Institute of Physics and Chemistry, Chinese Academy of Science, Beijing, 100190, P.R. China.

**Supporting Information 1:** The design of the interfaces with different gas bubble behaviors (gas superwettability) for various applications

**Table S1** Applications of the interfaces with different gas bubble behaviors (gas superwettability)

| <b>Superwettability of gas bubbles</b>                                                                                              | <b>Application</b>                  | <b>Characters of functional interfaces</b>                                                                 | <b>References</b>                                              |
|-------------------------------------------------------------------------------------------------------------------------------------|-------------------------------------|------------------------------------------------------------------------------------------------------------|----------------------------------------------------------------|
| Superaerophobicity (Bubble repellence)<br>Interfaces with tiny gas bubble release diameter and ultra-weak gas bubble adhesion force | Hydrogen Evolution Reaction (HER)   | Pine-shaped Pt nanoarray                                                                                   | <i>Adv. Funct. Mater.</i> <b>2015</b> , <i>25</i> , 1737–1744  |
|                                                                                                                                     |                                     | Vertically aligned MoS <sub>2</sub> nanoplates (200 nm in size and less than 5 nm in thickness)            | <i>Adv. Mater.</i> <b>2014</b> , <i>26</i> , 2683–2687         |
|                                                                                                                                     |                                     | Ultrathin Ni nanosheet arrays (2.2 nm)                                                                     | <i>Angew. Chem. Int. Ed.</i> <b>2016</b> , <i>55</i> , 693–697 |
|                                                                                                                                     |                                     | Amorphous MoS <sub>2</sub> porous thin film constructed by nanosheets with the size of several micrometers | <i>Chem. Commun.</i> , <b>2013</b> , <i>49</i> , 7516--7518    |
|                                                                                                                                     |                                     | Cu <sub>3</sub> P microsheets (lateral size: 6 μm, thickness: 510 nm)                                      | <i>Adv. Mater. Interfaces</i> <b>2016</b> , <i>3</i> , 1600236 |
|                                                                                                                                     |                                     | NiMo alloy (isolated hemispherical structure with abundant protrusions)                                    | <i>Small</i> <b>2016</b> , <i>12</i> , 2492–2498               |
|                                                                                                                                     | Hydrazine Oxidation Reaction (HzOR) | Vertically aligned Cu nanoplate array (average size: 500 nm, thickness: 50 nm)                             | <i>Adv. Mater.</i> <b>2015</b> , <i>27</i> , 2361–2366         |
|                                                                                                                                     |                                     | Ni nanoflower electrodes                                                                                   | <i>Nano Res.</i> <b>2015</b> , <i>8</i> , 3365–3371.           |
|                                                                                                                                     |                                     | Ultrathin Ni nanosheet arrays (thickness: 2.2 nm)                                                          | <i>Angew. Chem. Int. Ed.</i> <b>2016</b> , <i>55</i> , 693–697 |
|                                                                                                                                     |                                     | 3D porous Ni–Cu alloy film (400 nm flower-like nanostructure)                                              | <i>Nanoscale</i> <b>2016</b> , <i>8</i> , 1479–1484            |

|                                                                                            |                                                                                 |                                                                                                                                                                           |                                                        |
|--------------------------------------------------------------------------------------------|---------------------------------------------------------------------------------|---------------------------------------------------------------------------------------------------------------------------------------------------------------------------|--------------------------------------------------------|
|                                                                                            | Chlorine Evolution Reaction (CIER)                                              | RuO <sub>2</sub> @TiO <sub>2</sub> nanosheet array (Irregular sheet-like units with lateral size of 200 nm and thickness of 20 nm)                                        | <i>Small</i> <b>2017</b> , 13, 1602240                 |
|                                                                                            | Oxygen Evolution Reaction (OER)                                                 | Zn <sub>x</sub> Co <sub>3-x</sub> O <sub>4</sub> nanostructures constructed with secondary nanoneedles grown on primary rhombusshaped pillar arrays (pillar length: 15μm) | <i>Chem. Mater.</i> <b>2014</b> , 26, 1889–1895        |
|                                                                                            |                                                                                 | Cu <sub>3</sub> P microsheets (lateral size 6 μm, thickness is 510 nm)                                                                                                    | <i>Adv. Mater. Interfaces</i> <b>2016</b> , 3, 1600236 |
|                                                                                            |                                                                                 | NiFe-LDH nanoplates (500 nm) vertically grown on Ni foam                                                                                                                  | <i>Small</i> <b>2016</b> , 12, 2492–2498               |
| Hydrophilic/aerophobic                                                                     | Bubble-assisted (H <sub>2</sub> or O <sub>2</sub> ) electrodeposition processes | Nanotube-decorated polymer surfaces (without the aid of surfactants)                                                                                                      | <i>J. Mater. Chem. A</i> <b>2016</b> , 4, 17308–17323  |
| Superaerophilic Interfaces with trapped gas layer and ultra-high gas bubble adhesion force | Oxygen Reduction Reaction (OER)                                                 | Porous cobalt-incorporated nitrogen-doped carbon nanotube (CoNCNT) arrays on carbon-fiber paper (CFP)                                                                     | <i>Adv. Mater.</i> <b>2016</b> , 28, 7155-7161         |
|                                                                                            | Enzyme Biosensor                                                                | Pt particles (50 to 300 nm) on carbon fiber substrate (diameter: 10 μm)                                                                                                   | <i>Adv. Mater.</i> <b>2016</b> , 28, 1477–1481         |
| Janus membrane with asymmetric gas wettability                                             | Fine Bubble Aeration                                                            | Polypropylene membrane: one side: PDA/PEI-modified, superaerophobic the other side: unmodified surface, aerophilic                                                        | <i>Adv. Mater. Interfaces</i> <b>2016</b> , 1500774    |

**Supporting Information 2:** SEM side view images of the silicon surfaces with different microstructures (MSis, NSis and MNSis).

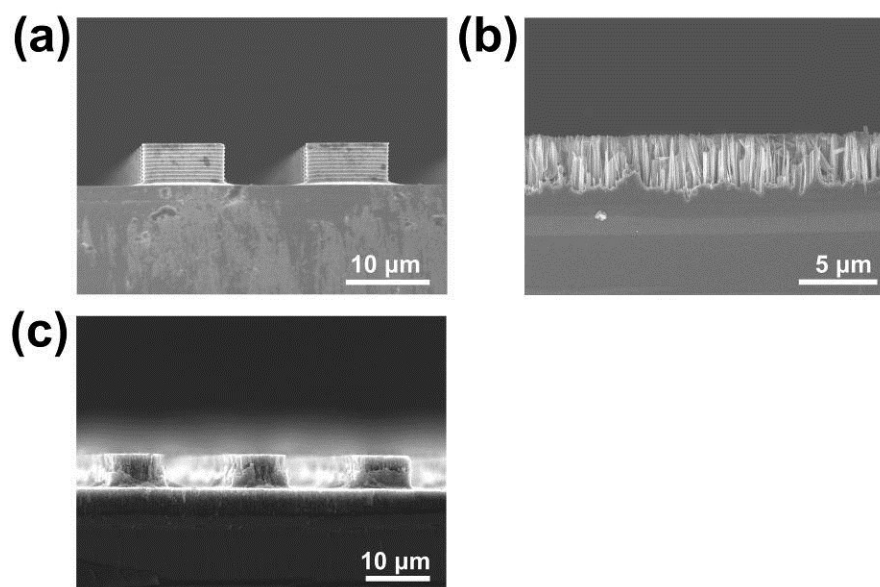

**Fig. S1** SEM side view images of the silicon surfaces with different microstructures (a) MSis (W/H/D = 10/5/10 μm); (b) NSis; and (c) MNSis (W/H/D = 10/5/10 μm).

**Supporting Information 3:** Water CAs of the hydrophobic silicon surfaces with different microstructure.

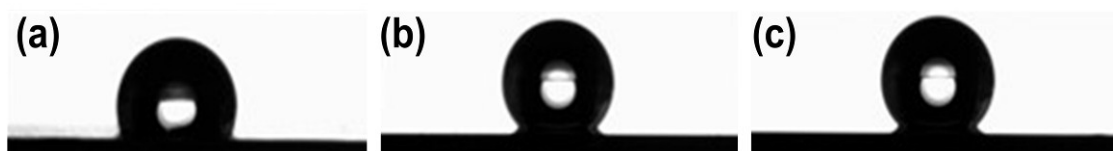

**Fig. S2** Water CAs of hydrophobic surfaces with different micro-structures (a) MSis (W/H/D = 10/5/10 μm); (c) NSis; and (d) MNSis (W/H/D = 10/5/10 μm).

**Supporting Information 4: Video 1** Gas bubble behavior on the SSis interface

**Supporting Information 5: Video 2** Gas bubble behavior on the FAS-SSis interface

**Supporting Information 6: Video 3** Gas bubble behavior on the MSis interface

**Supporting Information 7: Video 4** Gas bubble behavior on the FAS-MSis interface

**Supporting Information 8: Video 5** Gas bubble behavior on the NSis interface

**Supporting Information 9: Video 6** Gas bubble behavior on the FAS-NSis interface

**Supporting Information 10: Video 7** Gas bubble behavior on the MNSis interface

**Supporting Information 11: Video 8** Gas bubble behavior on the FAS-MNSis interface

**Supporting Information 12:** Series of video snapshots of representative gas bubble behavior from generation to departure on the hydrophobic MSis, NSis and MNSis interfaces.

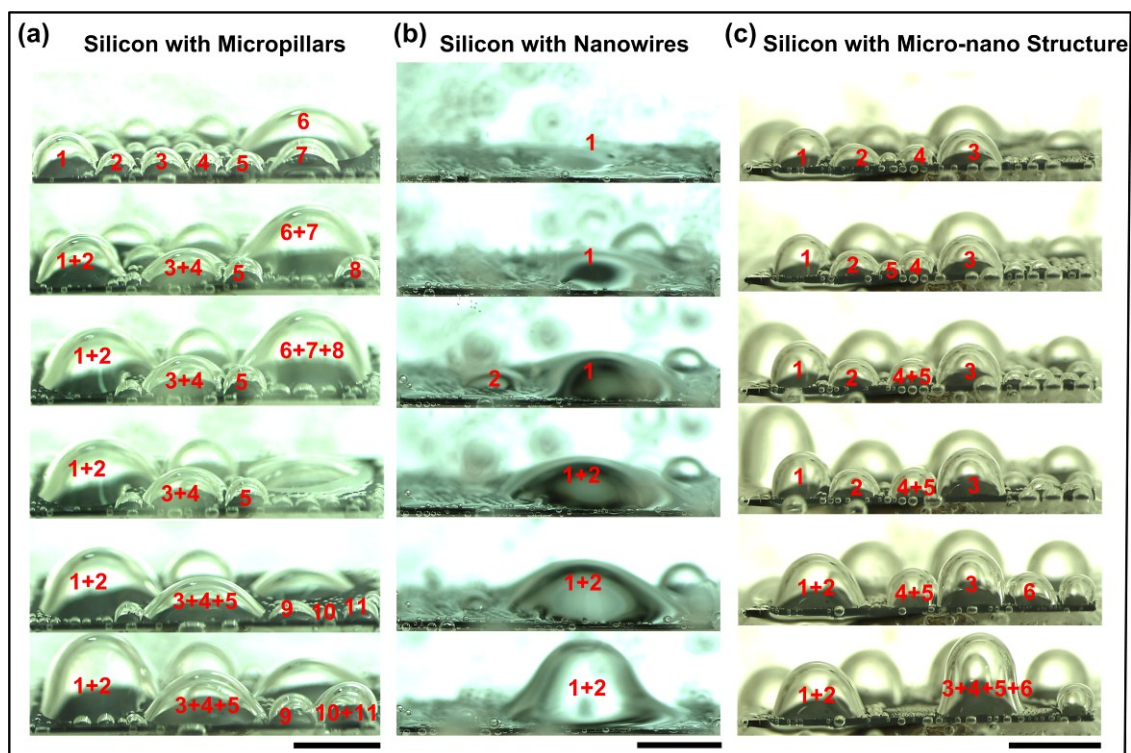

**Fig. S3** CO<sub>2</sub> bubble growth processes on the hydrophobic interfaces with different microstructures (a) MSis (W/H/D = 10/5/10 μm); (b) NSis; and (c) MNSis (W/H/D = 10/5/10 μm). The scale bars are 5 μm.

**Supporting Information 13:** Departure diameters of CO<sub>2</sub> bubbles on the hydrophobic interfaces with different microstructures (MSis10, NSis and MNSis10)

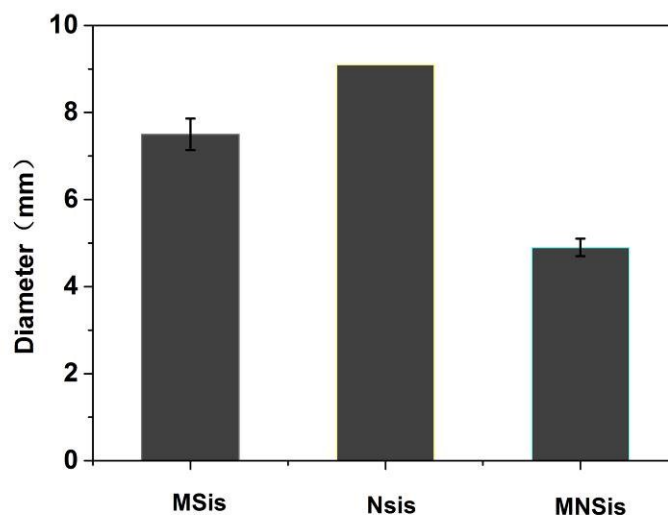

**Fig. S4** The departure diameters of CO<sub>2</sub> bubbles on the hydrophobic interfaces with different microstructures (MSis10, NSis and MNSis10).

**Supporting Information 14:** The adhesion forces between the CO<sub>2</sub> bubbles and the hydrophilic interfaces before FAS-modification.

Fig. S5 illustrates the adhesion force between CO<sub>2</sub> bubbles and the hydrophilic interfaces with different microstructures. The adhesion forces on the SSis and MSis interfaces are close to 0, while the adhesion force on the NSis and MNSis are a bit larger than 0. During the process of adhesion force measurement, the CO<sub>2</sub> bubbles were fixed on a superhydrophobic copper cap. The distance that the copper cap moved down is 2 mm. It is a bit larger than the diameter of CO<sub>2</sub> bubbles. The bubble volume suspended on the copper cap is 10 μL. Bubble diameter is 2.68 mm. Thus, as the hydrophilic interfaces approach the CO<sub>2</sub> bubble, the CO<sub>2</sub> bubble will be squeezed, and part of the bubble permeated into the nanowire structures. When the bubbles left the surface, the adhesion force increased due to the capillary force.

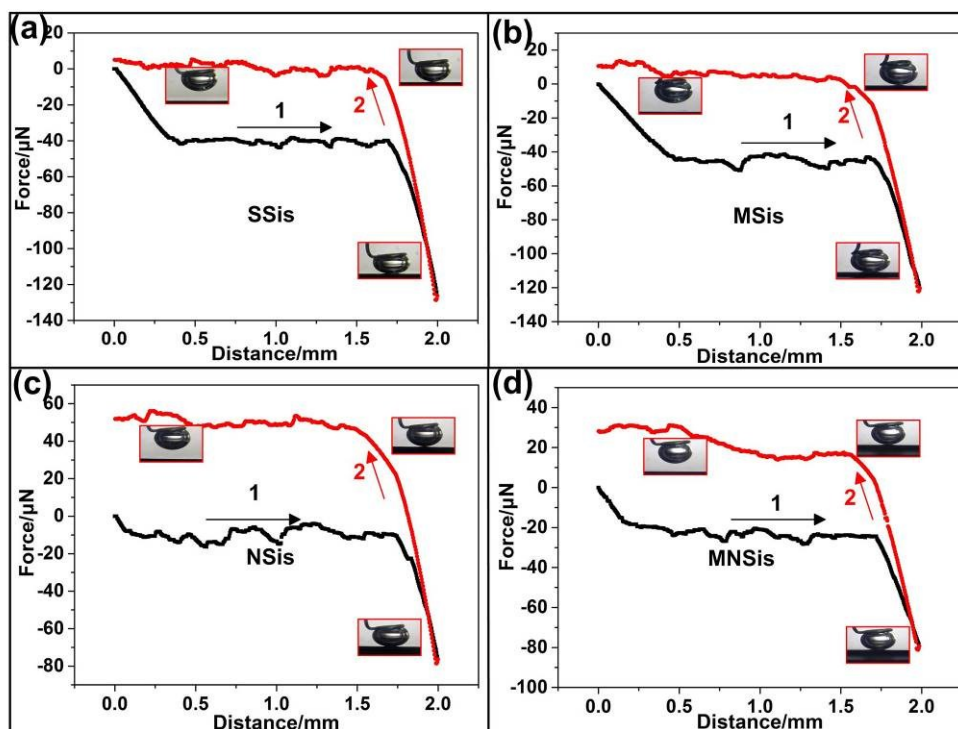

**Fig. S5.** The adhesion forces between CO<sub>2</sub> bubbles and hydrophilic interfaces with different structures before FAS-modification. (a) SSis; (b) MSis (W/H/D = 10/5/10 μm); (c) NSis; and (d) MNSis (W/H/D = 10/5/10 μm). The inset shows the photographs of the shapes of the CO<sub>2</sub> bubbles taken at the corresponding stages during the measurement process. Process 1: the hydrophilic interfaces approach the CO<sub>2</sub> bubble; Process 2: the hydrophilic interfaces leave the CO<sub>2</sub> bubble.

**Supporting Information 15:** The adhesion forces between the CO<sub>2</sub> bubbles and the hydrophobic interfaces after FAS-modification.

Fig. S6 shows the record force–distance curves between CO<sub>2</sub> bubbles and the hydrophobic interfaces with different microstructures. The maximum adhesion forces of the hydrophobic interfaces are larger than 200 μN.

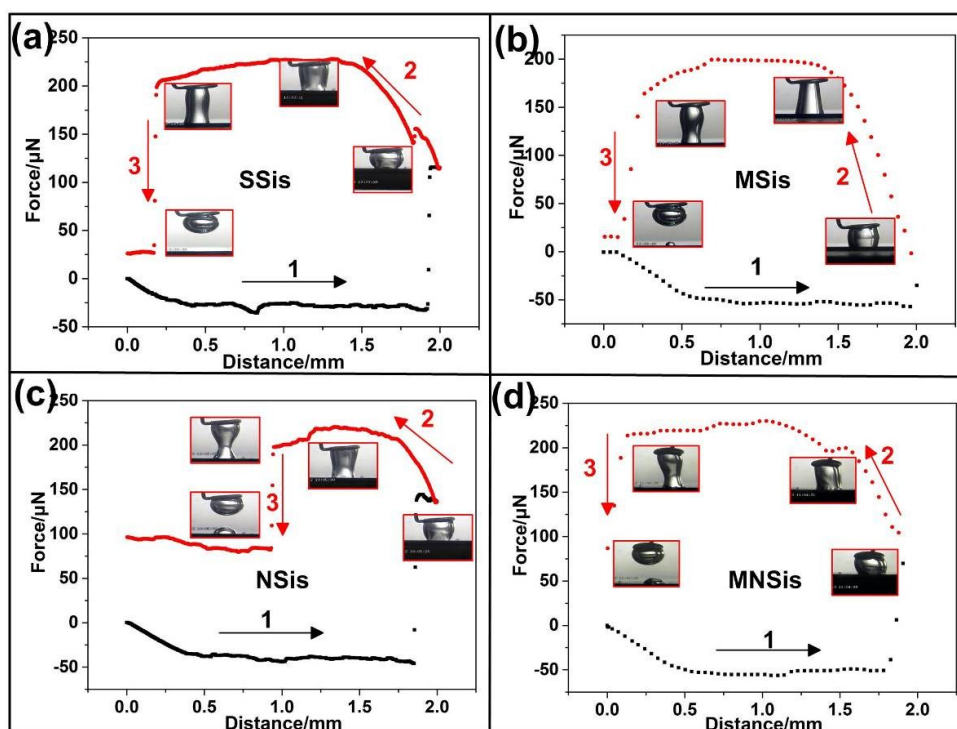

**Fig. S6** The adhesion forces between CO<sub>2</sub> bubbles and the hydrophobic interfaces with different microstructures after FAS-modification. (a) FAS-SSis; (b) FAS-MSis (W/H/D = 10/5/10 μm); (c) FAS-NSis; and (d) FAS-MNSis (W/H/D = 10/5/10 μm). The inset shows the photographs of the CO<sub>2</sub> bubble shapes taken at the corresponding stages during the measurement process. Process 1: the hydrophobic interfaces approach the CO<sub>2</sub> bubble; Process 2: the hydrophobic interfaces leave the CO<sub>2</sub> bubble; and Process 3: the hydrophobic interfaces surface break away from the CO<sub>2</sub> bubble.

**Supporting Information 16:** The adhesion forces between the CO<sub>2</sub> bubbles and the superhydrophobic interfaces after FAS-modification.

Fig. S7 shows the record force-distance curves during the measuring process between CO<sub>2</sub> bubbles and the superhydrophobic interfaces with different microstructures. The maximum forces were larger than 600 μN. The adhesion force on MNSis interface was closed to 1000 μN. From the inset photographs of the CO<sub>2</sub> bubble shapes taken at the corresponding stages, we can see that the bubbles left the superhydrophobic surfaces with parts of bubbles pinned to the surface. The force is the bubble breaking force. The adhesion forces on the superhydrophobic interfaces are larger than the test results.



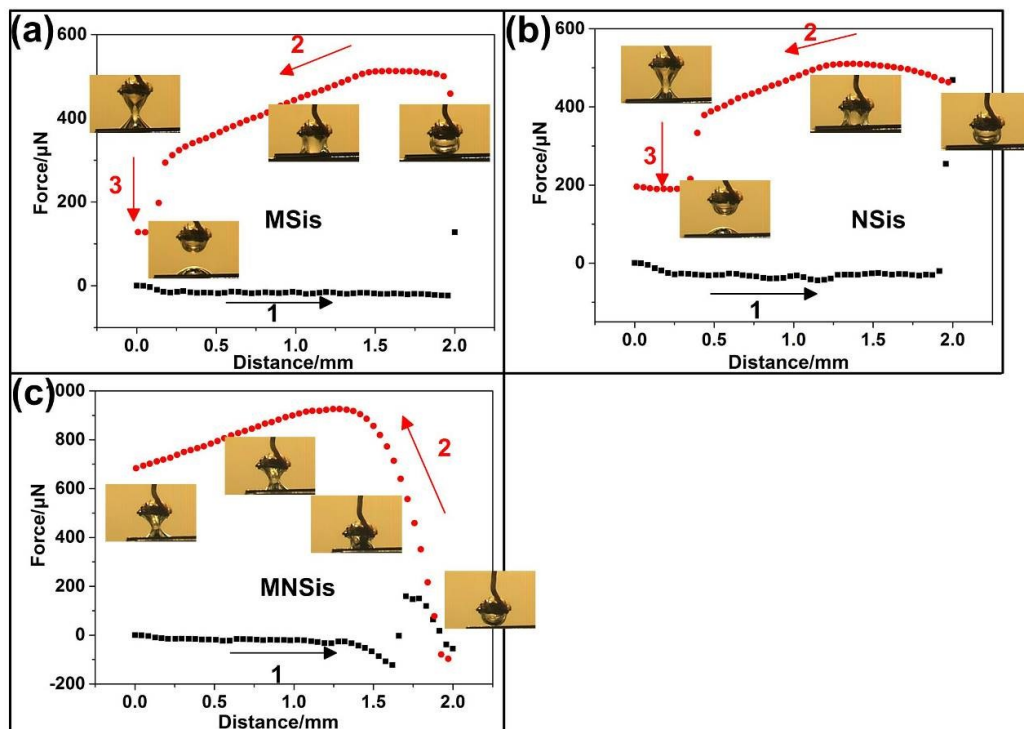

**Fig. S7** The adhesion forces between CO<sub>2</sub> bubbles and the superhydrophobic interfaces with different microstructures after FAS-modification. (a) FAS-MSis (W/H/D = 10/5/10 μm); (b) FAS-NSis; and (c) FAS-MNSis (W/H/D = 10/5/10 μm). The inset shows photographs of the CO<sub>2</sub> bubble shapes taken at the corresponding stages during the measurement process. Process 1: the superhydrophobic interfaces approach the CO<sub>2</sub> bubble; Process 2: the superhydrophobic interfaces leave the CO<sub>2</sub> bubble; Process 3: the superhydrophobic interfaces surface break away from the CO<sub>2</sub> bubble.

**Supporting Information 17:** SEM images of the substrate with different width of micropillars

In order to confirm the influence of the micropattern size on the CO<sub>2</sub> bubble behaviors, we selected another two kinds of micropillars with different width. They are MSis5 (W/H/D = 5/5/10 μm), MNSis5 (W/H/D=5/5/10 μm), MSis15 (W/H/D=15/5/10 μm) and MNSis15 (W/H/D=15/5/10 μm). Their SEM top and side view images are shown in Fig. S8 and S9.

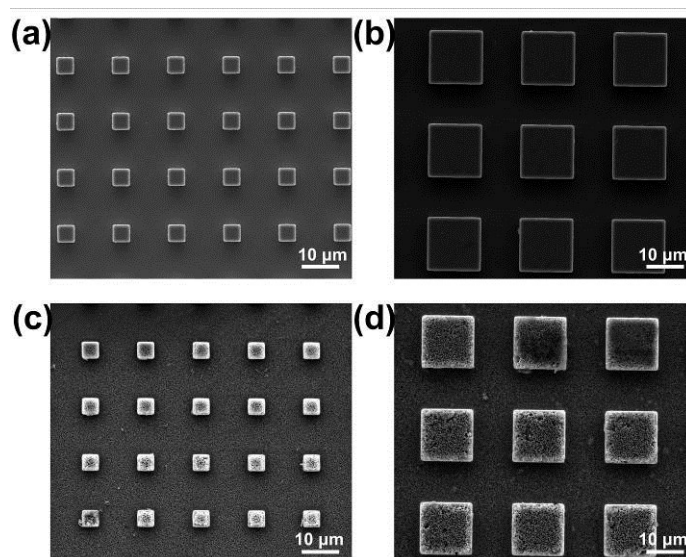

**Fig. S8** SEM top view images of the substrate with different width of micropillars (a) Msis5 (W/H/D = 5/5/10  $\mu\text{m}$ ) (b) Msis15 (W/H/D = 15/5/10  $\mu\text{m}$ ); (c) MNSis5 (W/H/D = 5/5/10  $\mu\text{m}$ ); and (d) MNSis15 (W/H/D = 15/5/10  $\mu\text{m}$ ).

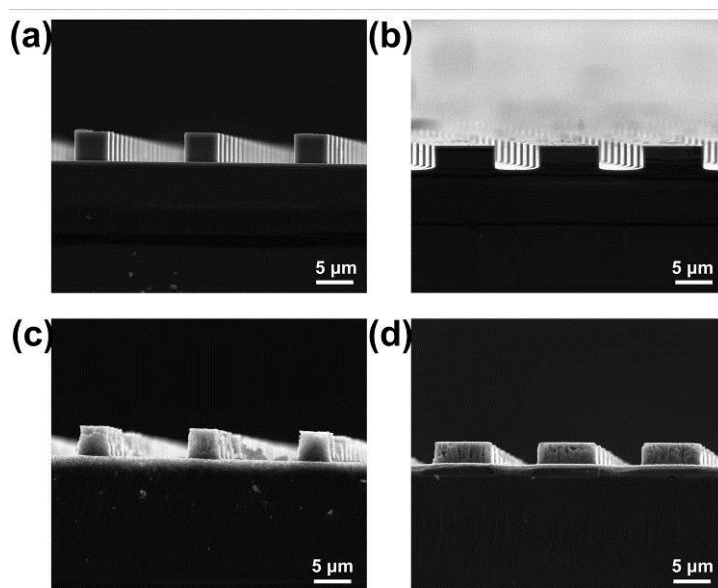

**Fig. S9** SEM side view images of the substrate with different width of micropillars (a) Msis5 (W/H/D = 5/5/10  $\mu\text{m}$ ) (b) Msis15 (W/H/D = 15/5/10  $\mu\text{m}$ ); (c) MNSis5 (W/H/D = 5/5/10  $\mu\text{m}$ ); and (d) MNSis15 (W/H/D = 15/5/10  $\mu\text{m}$ ).

**Supporting Information 18** The CO<sub>2</sub> bubble behaviors on the hydrophilic, hydrophobic and superhydrophobic interfaces

The in situ CO<sub>2</sub> bubble behaviors on the hydrophilic (Fig. S10, Fig. S11 and Fig. S12), hydrophobic (Fig. S13, Fig. S14 and Fig. S15) and superhydrophobic (Fig. S16, Fig. S17 and

Fig. S18) interfaces with different width of micropillars, including MSis5, MSis10, MSis15, MNSis5, MNSis10 and MNSis15, were investigated.

On the hydrophilic interfaces, many tiny CO<sub>2</sub> bubbles were generated and grew separately. The grown CO<sub>2</sub> bubbles then escaped from the hydrophilic interfaces with small diameters (Fig. S10). **The diameters of the released CO<sub>2</sub> bubbles on the interfaces with large width of micropillars are larger than that on the interfaces with small width of micropillars.** For example, the diameters of the released CO<sub>2</sub> bubbles on the MSis5, MSis10, MSis15 interfaces were 0.81, 1.20 and 1.24 mm, respectively. After constructing nanostructure on MSis, the diameters of released CO<sub>2</sub> bubbles decreased greatly. The diameters of the released CO<sub>2</sub> bubbles on MNSis5, MNSis10, MNSis15 interfaces dropped to 0.73, 0.77 and 0.84 mm, respectively (Fig. S11). However, the effect of the micropillar width on the adhesion force between CO<sub>2</sub> bubbles and the hydrophilic interfaces was little (Fig. S12). The adhesion forces on the MNSis interfaces are a bit bigger than those on the MSis interfaces.

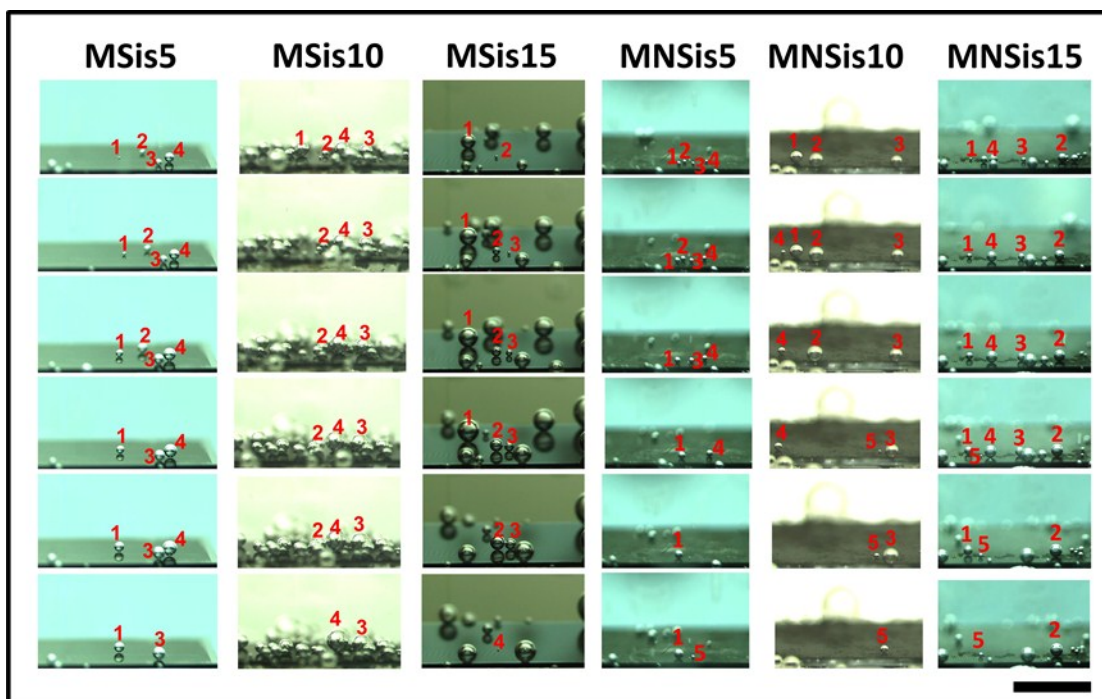

**Fig. S10** Series of video snapshots for representative CO<sub>2</sub> bubble growth processes on the hydrophilic interfaces with different width of micropillars, including MSis5 (W/H/D = 5/5/10 μm), MSis10 (W/H/D=10/5/10 μm), MSis15 (W/H/D=15/5/10 μm), MNSis5 (W/H/D=5/5/10 μm), MNSis10 (W/H/D=10/5/10 μm) and MNSis15 (W/H/D=15/5/10 μm). The scale bars are 5 mm.

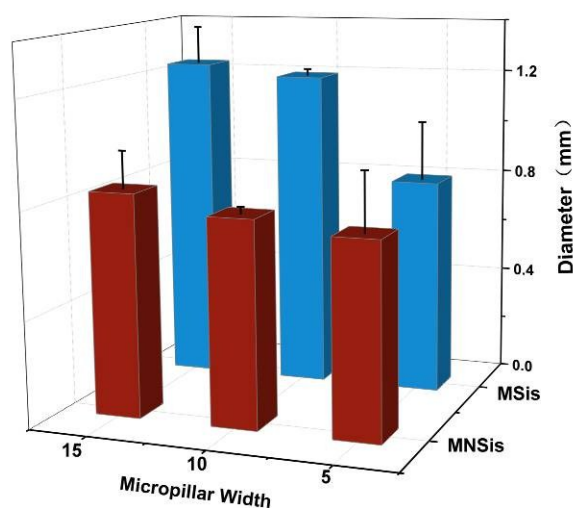

**Fig. S11** The departure diameters of CO<sub>2</sub> bubbles on the hydrophilic interfaces with different width of micropillars, including MSis5 (W/H/D = 5/5/10 μm), MSis10 (W/H/D=10/5/10 μm), MSis15 (W/H/D=15/5/10 μm), MNSis5 (W/H/D=5/5/10 μm), MNSis10 (W/H/D=10/5/10 μm) and MNSis15 (W/H/D=15/5/10 μm).

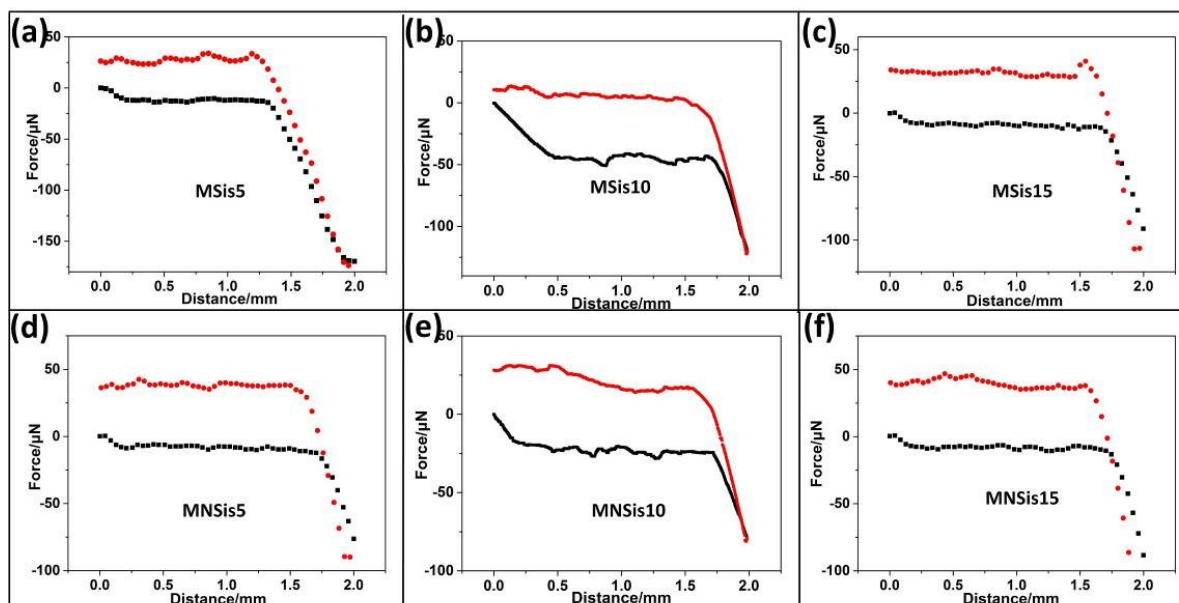

**Fig. S12** The adhesion forces between CO<sub>2</sub> bubbles and the hydrophilic interfaces with different width of micropillars, including MSis5 (W/H/D = 5/5/10 μm), MSis10 (W/H/D=10/5/10 μm), MSis15 (W/H/D=15/5/10 μm), MNSis5 (W/H/D=5/5/10 μm), MNSis10 (W/H/D=10/5/10 μm) and MNSis15 (W/H/D=15/5/10 μm).

On the hydrophobic interfaces, many CO<sub>2</sub> bubbles with spherical crown shapes are generated. The coalescence could be observed during the bubbles growth process. After the CO<sub>2</sub> bubbles were large enough to overcome the adhesion of the hydrophobic interfaces, they released with spherical crown shapes (Fig. S13). The diameters of the released CO<sub>2</sub> bubbles on the hydrophobic MSis5, MSis10, MSis15 interfaces with different width of micropillars were 3.92, 7.5 and 4.85 mm, respectively. When the nanowire arrays were fabricated on the micropillar interfaces, the diameters of the released CO<sub>2</sub> bubbles on the hydrophobic MNSis5, MNSis10, MNSis15 were 10.16, 4.9 and 10.8 mm (Fig. S14). The adhesion forces on the MSis5, MNSis5 and MNSis15 interfaces were closed to 400 μN, while the adhesion forces on the MSis10, MSis15 and MNSis10 interfaces were only 200 μN, as shown in Fig. S15. We believed that the irregular results of the CO<sub>2</sub> bubble departure diameter and the adhesion forces on hydrophobic interfaces may be cause by our FAS modification method. We adopted the chemical vapor deposition (CVD) to fabricated FAS modified silicon. The difference of

hydrophobicity was achieved by controlling deposition time. The deposition time was 2 h. Due to deposition time is limited, FAS molecules may not be uniformly grafted on the micro and nanostructures of MNSis. Thus, some areas are hydrophobic while some ones are hydrophilic.

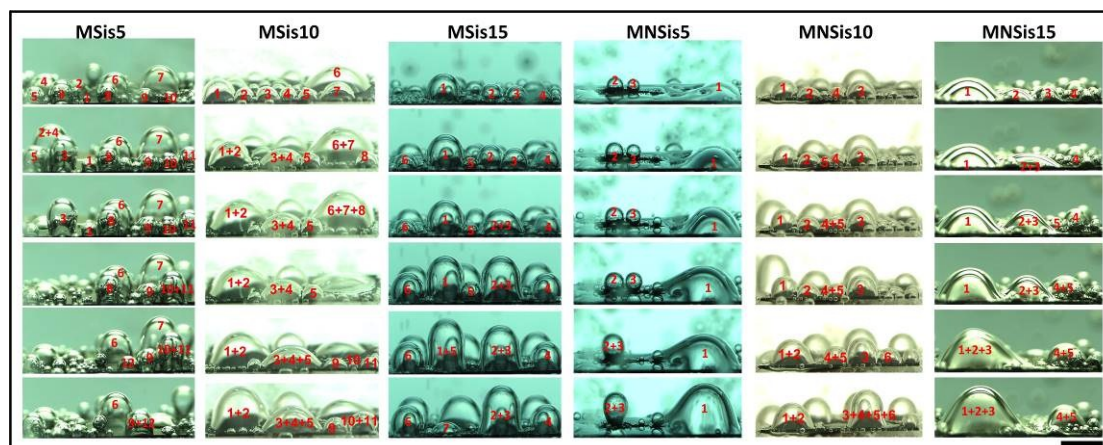

**Fig. S13** Series of video snapshots for representative CO<sub>2</sub> bubble growth processes on the hydrophobic interfaces with different width of micropillars, including MSis5 (W/H/D = 5/5/10 μm), MSis10 (W/H/D=10/5/10 μm), MSis15 (W/H/D=15/5/10 μm), MNSis5 (W/H/D=5/5/10 μm), MNSis10 (W/H/D=10/5/10 μm) and MNSis15 (W/H/D=15/5/10 μm). The scale bars are 5 mm.

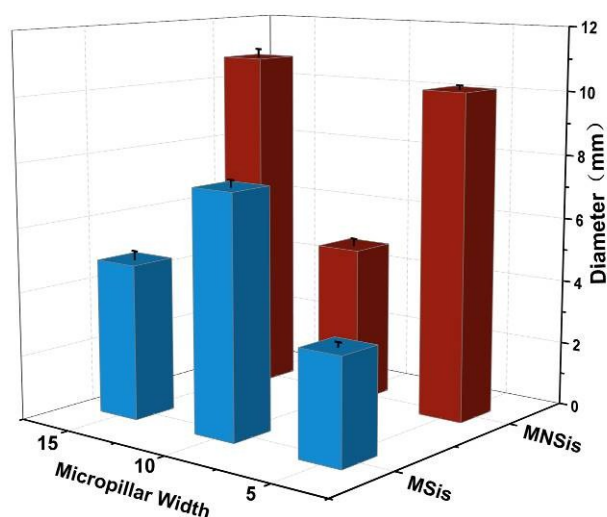

**Fig. S14** The departure diameters of CO<sub>2</sub> bubbles on the hydrophobic interfaces with different width of micropillars, including MSis5 (W/H/D = 5/5/10 μm), MSis10 (W/H/D=10/5/10 μm), MSis15 (W/H/D=15/5/10 μm), MNSis5 (W/H/D=5/5/10 μm), MNSis10 (W/H/D=10/5/10 μm) and MNSis15 (W/H/D=15/5/10 μm).

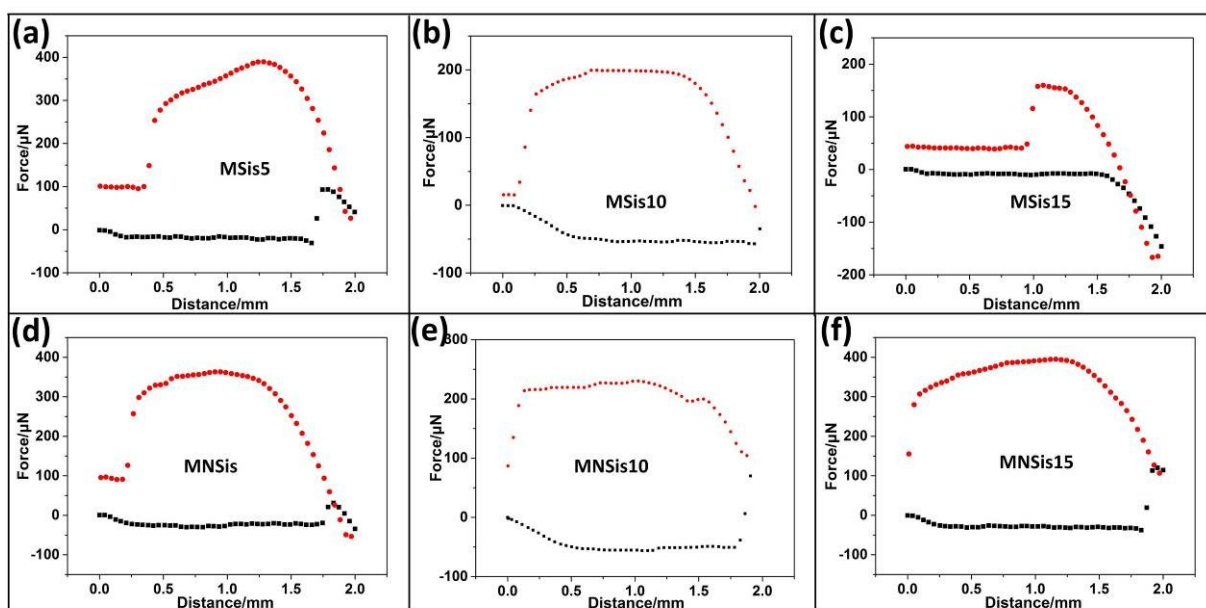

**Fig. S15** The adhesion forces between CO<sub>2</sub> bubbles and the hydrophobic interfaces with different width of micropillars, including MSis5 (W/H/D = 5/5/10 μm), MSis10 (W/H/D=10/5/10 μm), MSis15 (W/H/D=15/5/10 μm), MNSis5 (W/H/D=5/5/10 μm), MNSis10 (W/H/D=10/5/10 μm) and MNSis15 (W/H/D=15/5/10 μm).

On the superhydrophobic interfaces, a shining CO<sub>2</sub> gas film covered on them. The shining CO<sub>2</sub> gas film slowly bulged out over the interfaces. The bulge then grew higher and higher, and the three-phase contact line (TPCL) shrank. Therefore, the departure diameters of CO<sub>2</sub> bubbles on the superhydrophobic interfaces increased significantly (Fig. S16). On the superhydrophobic MSis interfaces, the diameters of the released CO<sub>2</sub> bubbles increased slightly if the micropillar width increased. When the nanowire arrays were fabricated on the MSis interfaces, the departure diameters of the CO<sub>2</sub> bubbles increase from 8.0, 9.2, and 10.7 mm on the MSis5, MSis10 and MSis15 interfaces to 16.1, 13.8, and 14.7 mm on the MNSis5, MNSis10 and MNSis15 interfaces, respectively (Fig. S17). The adhesion force between CO<sub>2</sub> bubbles and the superhydrophobic interfaces was quite high. The effect of the micropillar size on the adhesion force was little. The adhesion forces on the MNSis interfaces are much larger than those on the MSis interfaces (Fig. S18).

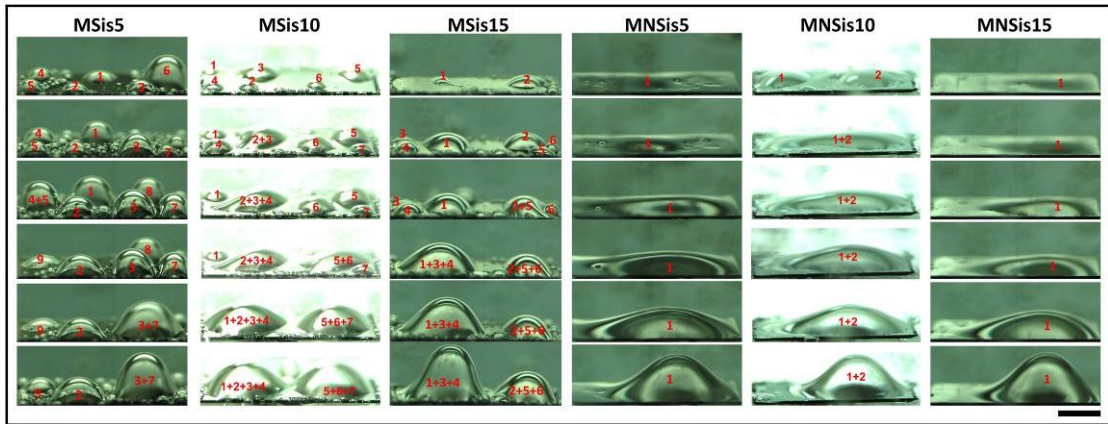

**Fig. S16** Series of video snapshots for representative CO<sub>2</sub> bubble growth processes on the superhydrophobic interfaces with different with different width of micropillars, including MSis5 (W/H/D = 5/5/10 μm), MSis10 (W/H/D=10/5/10 μm), MSis15 (W/H/D=15/5/10 μm), MNSis5 (W/H/D=5/5/10 μm), MNSis10 (W/H/D=10/5/10 μm) and MNSis15 (W/H/D=15/5/10 μm). The scale bars are 5 mm.

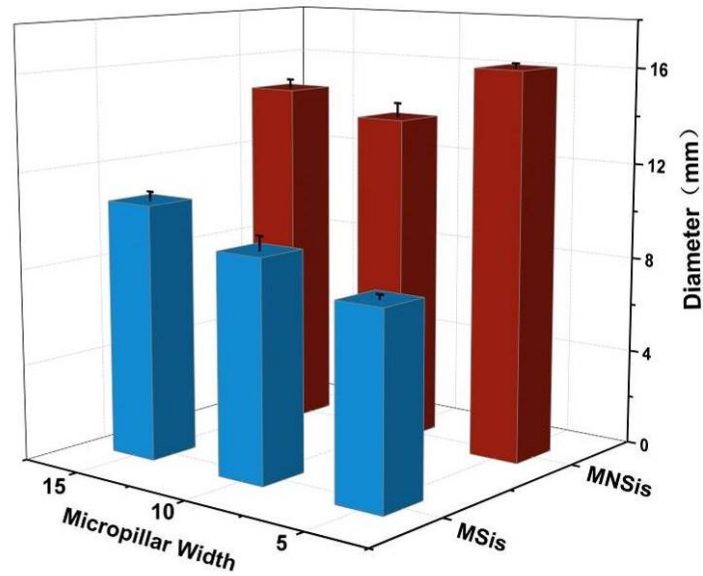

**Fig. S17** The departure diameters of CO<sub>2</sub> bubbles on the superhydrophobic interfaces with different width of micropillars, including MSis5 (W/H/D = 5/5/10 μm), MSis10 (W/H/D=10/5/10 μm), MSis15 (W/H/D=15/5/10 μm), MNSis5 (W/H/D=5/5/10 μm), MNSis10 (W/H/D=10/5/10 μm) and MNSis15 (W/H/D=15/5/10 μm).



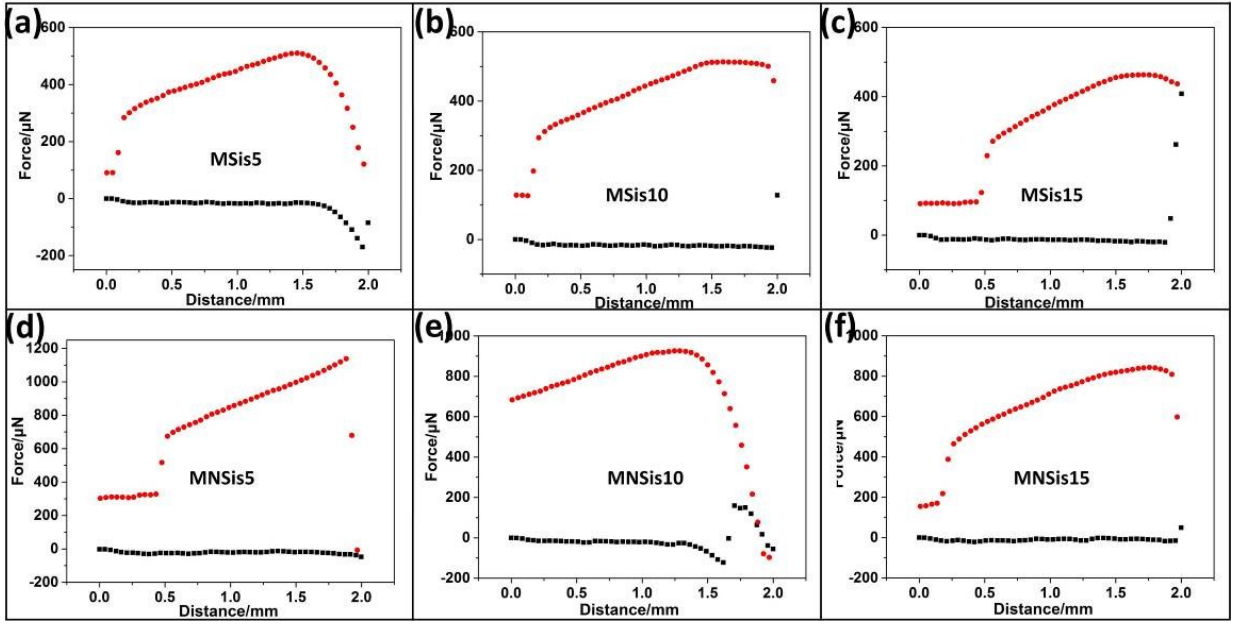

**Fig. S18** The adhesion forces between CO<sub>2</sub> bubbles and the superhydrophobic interfaces with different width of micropillars, including MSis5 (W/H/D = 5/5/10 μm), MSis10 (W/H/D=10/5/10 μm), MSis15 (W/H/D=15/5/10 μm), MNSis5 (W/H/D=5/5/10 μm), MNSis10 (W/H/D=10/5/10 μm) and MNSis15 (W/H/D=15/5/10 μm).

Therefore, the size of the micropattern (including width, distance and height of the micropillars) could affect the CO<sub>2</sub> bubble behaviors. However, compared with the scale of the rough structures (i.e., microscale and nanoscale), the effect of the micropattern size is not significant. That is to say, the difference of the CO<sub>2</sub> bubble behaviors between the interfaces with different scale of the structures is more significant than that between interface the sizes of microstructures under the same scale.

**Supporting Information 19:** In the supersaturated solution, CO<sub>2</sub> molecules transfer from the bulk of a supersaturated liquid to a bubble surface. The bubble growth rate  $k$  can be calculated as follows:

$$k = \frac{dR}{dt} \approx 0.63 \frac{k_B T}{P_0} D^{2/3} \left( \frac{2\alpha\rho g}{9\eta} \right)^{1/3} \Delta c \quad (\text{S1})$$

Here  $R$  is bubble radius,  $k_B$  is Boltzmann constant,  $T$  is solution temperature,  $\eta$  is fluid solution dynamic viscosity,  $\rho$  is fluid density,  $P_0$  is atmospheric pressure,  $D$  is diffusion

coefficient of dissolved CO<sub>2</sub> molecules in the liquid and  $\alpha$  is a numerical prefactor which is close to 0.7.

$$\Delta c = c_L - c_0$$

Here  $c_0$  is equilibrium concentration of dissolved CO<sub>2</sub> molecules in the liquid medium corresponding to a pressure of CO<sub>2</sub> molecules in the vapor phase of 1 atm, and  $c_L$  is concentration of dissolved CO<sub>2</sub> molecules in the supersaturated liquid medium corresponding to a pressure of CO<sub>2</sub> molecules in 1.5 atm.

**Supporting Information 20:** Bubble CAs on the interfaces with different microstructures and chemical components.

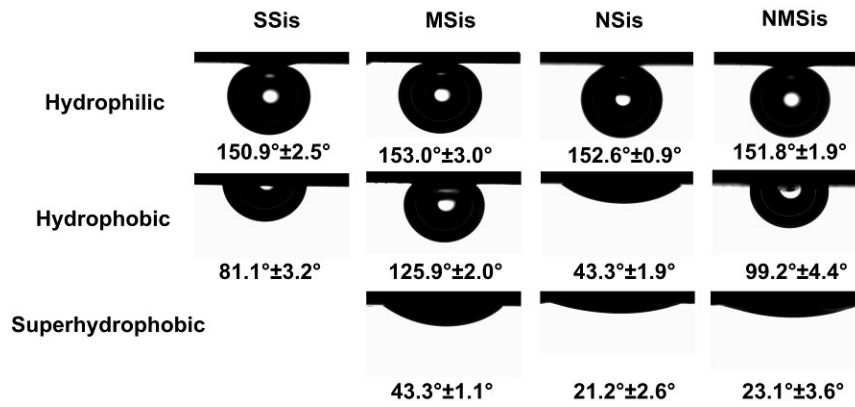

**Fig. S19** Bubble CAs on the interfaces with different microstructures and chemical components.

**Supporting Information 21:** When the buoyancy of the gas bubble balances the wetting force,  $F_w = F_b$ ,

$$6\gamma \sin^2 \theta = \rho g R^2 (1 + \cos \theta)^2 (2 - \cos \theta)$$

$$6\gamma (1 - \cos \theta) = \rho g R^2 (1 + \cos \theta) (2 - \cos \theta)$$

$$\therefore \cos \theta = \frac{1 - \tan^2 \frac{\theta}{2}}{1 + \tan^2 \frac{\theta}{2}}$$

$$\therefore R^2 = \frac{6\gamma \tan^2 \theta/2 (1 + \tan^2 \theta/2)}{\rho g (1 + 3 \tan^2 \theta/2)}$$

$$\therefore R^2 = \frac{6\gamma \tan^2 \theta/2}{\rho g \left(1 + \frac{2}{1 + \frac{1}{\tan^2 \theta/2}}\right)}$$
